# Supplementary material for: Priority Setting in the Polish Health Care System According to Patients’ Perspective
Source: Int J Environ Res Public Health. 2021 Jan 28;18(3):1178. doi: 10.3390/ijerph18031178 (PMC7908543; doi:10.3390/ijerph18031178)
Supplement: Supplementary file 1 [file ijerph-18-01178-s001.pdf]

## Priority setting in the Polish Health Care System

*- patients perspective*

Dear Sir / Madam,

We would appreciate if you took part in a scientific study aimed at defining the direction of changes necessary to increase the efficiency of a healthcare system. The research is being conducted by the Healthcare Policy Chair at the Medical University of Lodz and the Research Centre for Healthcare Strategy and Health Protection Policy at the Warsaw School of Economics in cooperation with the National Medical University in Kiev, and it seeks to promote optimal solutions in the terms of organization, functioning and financing of healthcare. By completing this questionnaire form, you agree to give your consent to use the introduced data strictly for research purposes, and the authors of the study guarantee you anonymity.

*Research Team*

### DEMOGRAPHIC QUESTIONS

#### Gender

F ☐ M ☐

Age (*the year of birth*)

#### Education

Primary ☐  
Secondary ☐  
University ☐

#### Residence

Village/rural area ☐  
Small town (<20 000 residents) ☐  
Medium-sized city (20 000-100 000 residents) ☐  
Big-sized city (100 000-500 000 residents) ☐  
Biggest city (> 500 000 residents) ☐

#### Married

Yes ☐  
No ☐

#### Employment

Student ☐  
Employed ☐  
Unemployed ☐

**What is your marital status?** (-3- definitely bad, -2 bad, -1 – rather bad, 0 – no opinion, 1 rather good, 2 – good, 3 – definitely good)

-3 ☐ -2 ☐ -1 ☐ 0 ☐ 1 ☐ 2 ☐ 3 ☐

**How do you assess your health status?** (-3- definitely bad, -2 bad, -1 – rather bad, 0 – no opinion, 1 rather good, 2 – good, 3 – definitely good)

-3 ☐ -2 ☐ -1 ☐ 0 ☐ 1 ☐ 2 ☐ 3 ☐

**Are you interested in healthcare system changes?** (-3- definitely not, -2 not, -1 – rather not, 0 – no opinion, 1 rather yes, 2 – yes, 3 – definitely yes)

-3 ☐ -2 ☐ -1 ☐ 0 ☐ 1 ☐ 2 ☐ 3 ☐

### Frequency of receiving health care

|                                  |                          |
|----------------------------------|--------------------------|
| a few times a month              | <input type="checkbox"/> |
| once a month                     | <input type="checkbox"/> |
| every three months               | <input type="checkbox"/> |
| every six months                 | <input type="checkbox"/> |
| once a year                      | <input type="checkbox"/> |
| less frequently than once a year | <input type="checkbox"/> |

### Form of health care the respondents use most frequently

|                                       |                          |
|---------------------------------------|--------------------------|
| Basic health care                     | <input type="checkbox"/> |
| Specialist care in outpatient clinics | <input type="checkbox"/> |
| Hospitals                             | <input type="checkbox"/> |

### Form of health care the respondents use more frequently

|                         |                          |
|-------------------------|--------------------------|
| Public/State facilities | <input type="checkbox"/> |
| Private facilities      | <input type="checkbox"/> |

## POLISH HEALTH CARE SYSTEM

**1. General assessment of the health care system in Poland** (-3- definitely bad, -2 bad, -1 – rather bad, 0 – no opinion, 1 rather good, 2 – good, 3 – definitely good)

-3 ☐ -2 ☐ -1 ☐ 0 ☐ 1 ☐ 2 ☐ 3 ☐

**2. Factors contributing to delayed diagnosis** (-3- definitely not, -2 not, -1 – rather not, 0 – no opinion, 1 rather yes, 2 – yes, 3 – definitely yes)

|                                                |                                                                                                                                                                                                 |
|------------------------------------------------|-------------------------------------------------------------------------------------------------------------------------------------------------------------------------------------------------|
| visiting primary care physicians too late      | 3 <input type="checkbox"/> -2 <input type="checkbox"/> -1 <input type="checkbox"/> 0 <input type="checkbox"/> 1 <input type="checkbox"/> 2 <input type="checkbox"/> 3 <input type="checkbox"/>  |
| visiting medical specialists too late          | -3 <input type="checkbox"/> -2 <input type="checkbox"/> -1 <input type="checkbox"/> 0 <input type="checkbox"/> 1 <input type="checkbox"/> 2 <input type="checkbox"/> 3 <input type="checkbox"/> |
| too long waiting times for medical specialists | -3 <input type="checkbox"/> -2 <input type="checkbox"/> -1 <input type="checkbox"/> 0 <input type="checkbox"/> 1 <input type="checkbox"/> 2 <input type="checkbox"/> 3 <input type="checkbox"/> |
| too long waiting times for hospital treatment  | -3 <input type="checkbox"/> -2 <input type="checkbox"/> -1 <input type="checkbox"/> 0 <input type="checkbox"/> 1 <input type="checkbox"/> 2 <input type="checkbox"/> 3 <input type="checkbox"/> |

|                                                                    |    |                          |    |                          |    |                          |   |                          |   |                          |   |                          |   |                          |
|--------------------------------------------------------------------|----|--------------------------|----|--------------------------|----|--------------------------|---|--------------------------|---|--------------------------|---|--------------------------|---|--------------------------|
| poorly developed prevention efforts                                | -3 | <input type="checkbox"/> | -2 | <input type="checkbox"/> | -1 | <input type="checkbox"/> | 0 | <input type="checkbox"/> | 1 | <input type="checkbox"/> | 2 | <input type="checkbox"/> | 3 | <input type="checkbox"/> |
| insufficient financial resources allocated to health care services | -3 | <input type="checkbox"/> | -2 | <input type="checkbox"/> | -1 | <input type="checkbox"/> | 0 | <input type="checkbox"/> | 1 | <input type="checkbox"/> | 2 | <input type="checkbox"/> | 3 | <input type="checkbox"/> |
| ignoring the disease symptoms by patients                          | -3 | <input type="checkbox"/> | -2 | <input type="checkbox"/> | -1 | <input type="checkbox"/> | 0 | <input type="checkbox"/> | 1 | <input type="checkbox"/> | 2 | <input type="checkbox"/> | 3 | <input type="checkbox"/> |
| self-healing                                                       | -3 | <input type="checkbox"/> | -2 | <input type="checkbox"/> | -1 | <input type="checkbox"/> | 0 | <input type="checkbox"/> | 1 | <input type="checkbox"/> | 2 | <input type="checkbox"/> | 3 | <input type="checkbox"/> |
| too late diagnosis                                                 | -3 | <input type="checkbox"/> | -2 | <input type="checkbox"/> | -1 | <input type="checkbox"/> | 0 | <input type="checkbox"/> | 1 | <input type="checkbox"/> | 2 | <input type="checkbox"/> | 3 | <input type="checkbox"/> |
| poor availability of diagnostic tests                              | -3 | <input type="checkbox"/> | -2 | <input type="checkbox"/> | -1 | <input type="checkbox"/> | 0 | <input type="checkbox"/> | 1 | <input type="checkbox"/> | 2 | <input type="checkbox"/> | 3 | <input type="checkbox"/> |
| too long waiting times for diagnostic test results                 | -3 | <input type="checkbox"/> | -2 | <input type="checkbox"/> | -1 | <input type="checkbox"/> | 0 | <input type="checkbox"/> | 1 | <input type="checkbox"/> | 2 | <input type="checkbox"/> | 3 | <input type="checkbox"/> |
| not taking care of health by patients                              | -3 | <input type="checkbox"/> | -2 | <input type="checkbox"/> | -1 | <input type="checkbox"/> | 0 | <input type="checkbox"/> | 1 | <input type="checkbox"/> | 2 | <input type="checkbox"/> | 3 | <input type="checkbox"/> |

**3. To what extent do you agree with the following opinions on the public health care system** (-3- definitely not, -2 not, -1 – rather not, 0 – no opinion, 1 rather yes, 2 – yes, 3 – definitely yes)

|                                                                                                     |    |                          |    |                          |    |                          |   |                          |   |                          |   |                          |   |                          |
|-----------------------------------------------------------------------------------------------------|----|--------------------------|----|--------------------------|----|--------------------------|---|--------------------------|---|--------------------------|---|--------------------------|---|--------------------------|
| patients are treated with kindness and care                                                         | -3 | <input type="checkbox"/> | -2 | <input type="checkbox"/> | -1 | <input type="checkbox"/> | 0 | <input type="checkbox"/> | 1 | <input type="checkbox"/> | 2 | <input type="checkbox"/> | 3 | <input type="checkbox"/> |
| it is easy to make an appointment with a primary care doctor                                        | -3 | <input type="checkbox"/> | -2 | <input type="checkbox"/> | -1 | <input type="checkbox"/> | 0 | <input type="checkbox"/> | 1 | <input type="checkbox"/> | 2 | <input type="checkbox"/> | 3 | <input type="checkbox"/> |
| it is easy to obtain information on availability of health services                                 | -3 | <input type="checkbox"/> | -2 | <input type="checkbox"/> | -1 | <input type="checkbox"/> | 0 | <input type="checkbox"/> | 1 | <input type="checkbox"/> | 2 | <input type="checkbox"/> | 3 | <input type="checkbox"/> |
| medical treatment is entirely free                                                                  | -3 | <input type="checkbox"/> | -2 | <input type="checkbox"/> | -1 | <input type="checkbox"/> | 0 | <input type="checkbox"/> | 1 | <input type="checkbox"/> | 2 | <input type="checkbox"/> | 3 | <input type="checkbox"/> |
| treatment conditions are good                                                                       | -3 | <input type="checkbox"/> | -2 | <input type="checkbox"/> | -1 | <input type="checkbox"/> | 0 | <input type="checkbox"/> | 1 | <input type="checkbox"/> | 2 | <input type="checkbox"/> | 3 | <input type="checkbox"/> |
| doctors are willing to give referrals to medical specialists if the patient's condition requires so | -3 | <input type="checkbox"/> | -2 | <input type="checkbox"/> | -1 | <input type="checkbox"/> | 0 | <input type="checkbox"/> | 1 | <input type="checkbox"/> | 2 | <input type="checkbox"/> | 3 | <input type="checkbox"/> |
| patients can expect immediate medical assistance                                                    | -3 | <input type="checkbox"/> | -2 | <input type="checkbox"/> | -1 | <input type="checkbox"/> | 0 | <input type="checkbox"/> | 1 | <input type="checkbox"/> | 2 | <input type="checkbox"/> | 3 | <input type="checkbox"/> |
| all patients are treated equally                                                                    | -3 | <input type="checkbox"/> | -2 | <input type="checkbox"/> | -1 | <input type="checkbox"/> | 0 | <input type="checkbox"/> | 1 | <input type="checkbox"/> | 2 | <input type="checkbox"/> | 3 | <input type="checkbox"/> |

**4. Evaluation of the quality of health services:** (-3- definitely bad, -2 bad, -1 – rather bad, 0 – no opinion, 1 rather good, 2 – good, 3 – definitely good)

|                                                          |    |                          |    |                          |    |                          |   |                          |   |                          |   |                          |   |                          |
|----------------------------------------------------------|----|--------------------------|----|--------------------------|----|--------------------------|---|--------------------------|---|--------------------------|---|--------------------------|---|--------------------------|
| in <u>public</u> institutions of the health care system  | -3 | <input type="checkbox"/> | -2 | <input type="checkbox"/> | -1 | <input type="checkbox"/> | 0 | <input type="checkbox"/> | 1 | <input type="checkbox"/> | 2 | <input type="checkbox"/> | 3 | <input type="checkbox"/> |
| in <u>private</u> institutions of the health care system | -3 | <input type="checkbox"/> | -2 | <input type="checkbox"/> | -1 | <input type="checkbox"/> | 0 | <input type="checkbox"/> | 1 | <input type="checkbox"/> | 2 | <input type="checkbox"/> | 3 | <input type="checkbox"/> |

**5. Evaluation of the availability of health services:** (-3- definitely bad, -2 bad, -1 – rather bad, 0 – no opinion, 1 rather good, 2 – good, 3 – definitely good)

|                                                          |    |                          |    |                          |    |                          |   |                          |   |                          |   |                          |   |                          |
|----------------------------------------------------------|----|--------------------------|----|--------------------------|----|--------------------------|---|--------------------------|---|--------------------------|---|--------------------------|---|--------------------------|
| in <u>public</u> institutions of the health care system  | -3 | <input type="checkbox"/> | -2 | <input type="checkbox"/> | -1 | <input type="checkbox"/> | 0 | <input type="checkbox"/> | 1 | <input type="checkbox"/> | 2 | <input type="checkbox"/> | 3 | <input type="checkbox"/> |
| in <u>private</u> institutions of the health care system | -3 | <input type="checkbox"/> | -2 | <input type="checkbox"/> | -1 | <input type="checkbox"/> | 0 | <input type="checkbox"/> | 1 | <input type="checkbox"/> | 2 | <input type="checkbox"/> | 3 | <input type="checkbox"/> |

**6. Factors influencing the effectiveness of the health care system** (-3- definitely not, -2 not, -1 – rather not, 0 – no opinion, 1 rather yes, 2 – yes, 3 – definitely yes)

|                                              |    |                          |    |                          |    |                          |   |                          |   |                          |   |                          |   |                          |
|----------------------------------------------|----|--------------------------|----|--------------------------|----|--------------------------|---|--------------------------|---|--------------------------|---|--------------------------|---|--------------------------|
| organization of the health care system       | -3 | <input type="checkbox"/> | -2 | <input type="checkbox"/> | -1 | <input type="checkbox"/> | 0 | <input type="checkbox"/> | 1 | <input type="checkbox"/> | 2 | <input type="checkbox"/> | 3 | <input type="checkbox"/> |
| financing of health care                     | -3 | <input type="checkbox"/> | -2 | <input type="checkbox"/> | -1 | <input type="checkbox"/> | 0 | <input type="checkbox"/> | 1 | <input type="checkbox"/> | 2 | <input type="checkbox"/> | 3 | <input type="checkbox"/> |
| number of practicing doctors                 | -3 | <input type="checkbox"/> | -2 | <input type="checkbox"/> | -1 | <input type="checkbox"/> | 0 | <input type="checkbox"/> | 1 | <input type="checkbox"/> | 2 | <input type="checkbox"/> | 3 | <input type="checkbox"/> |
| competences of practicing doctors            | -3 | <input type="checkbox"/> | -2 | <input type="checkbox"/> | -1 | <input type="checkbox"/> | 0 | <input type="checkbox"/> | 1 | <input type="checkbox"/> | 2 | <input type="checkbox"/> | 3 | <input type="checkbox"/> |
| hospital infrastructure                      | -3 | <input type="checkbox"/> | -2 | <input type="checkbox"/> | -1 | <input type="checkbox"/> | 0 | <input type="checkbox"/> | 1 | <input type="checkbox"/> | 2 | <input type="checkbox"/> | 3 | <input type="checkbox"/> |
| medical equipment in diagnostics and therapy | -3 | <input type="checkbox"/> | -2 | <input type="checkbox"/> | -1 | <input type="checkbox"/> | 0 | <input type="checkbox"/> | 1 | <input type="checkbox"/> | 2 | <input type="checkbox"/> | 3 | <input type="checkbox"/> |
| costs of medications                         | -3 | <input type="checkbox"/> | -2 | <input type="checkbox"/> | -1 | <input type="checkbox"/> | 0 | <input type="checkbox"/> | 1 | <input type="checkbox"/> | 2 | <input type="checkbox"/> | 3 | <input type="checkbox"/> |

prevention/ health education

-3 ☐ -2 ☐ -1 ☐ 0 ☐ 1 ☐ 2 ☐ 3 ☐

**7. Factors/aspects/areas requiring immediate improvements** (-3- definitely not, -2 not, -1 – rather not, 0 – no opinion, 1 rather yes, 2 – yes, 3 – definitely yes)

quality of health care

-3 ☐ -2 ☐ -1 ☐ 0 ☐ 1 ☐ 2 ☐ 3 ☐

availability of health care

-3 ☐ -2 ☐ -1 ☐ 0 ☐ 1 ☐ 2 ☐ 3 ☐

range of benefits financed from health insurance contributions

-3 ☐ -2 ☐ -1 ☐ 0 ☐ 1 ☐ 2 ☐ 3 ☐

financing of health care

-3 ☐ -2 ☐ -1 ☐ 0 ☐ 1 ☐ 2 ☐ 3 ☐

infrastructure of health care entities (building, equipment)

-3 ☐ -2 ☐ -1 ☐ 0 ☐ 1 ☐ 2 ☐ 3 ☐

knowledge, skills and competences of medical personnel

-3 ☐ -2 ☐ -1 ☐ 0 ☐ 1 ☐ 2 ☐ 3 ☐

**8. Sources of financing health care services** (select max. 3 items)

regarding the following items:

the state  
(taxes)

compulsory health  
insurance

voluntary health  
insurance

the patient's  
own financial  
resources

primary healthcare

☐☐☐☐

specialist care

☐☐☐☐

highly specialized services

☐☐☐☐

hospital treatment

☐☐☐☐

prevention services

☐☐☐☐

dental treatment

☐☐☐☐

medical rehabilitation

☐☐☐☐

hospice and palliative care

☐☐☐☐

emergency medical services

☐☐☐☐

spa treatment

☐☐☐☐

**9. Healthcare professional salaries – opinion about minimum and maximum remunerations**

min

max

doctors

nurses

paramedics

**10. Which of the areas of healthcare should most funds be allocated to ?** (max 3 items)

primary healthcare

specialist care

highly specialized services

hospital treatment

prevention services

dental treatment

rehabilitation

hospice and palliative care

emergency medical services

spa treatment

**11. Should patients pay for every medical treatment?**

no

☐

yes (give the maximum contribution)

**12. Factors/areas requiring changes in the Polish health care system** (-3- definitely not, -2 not, -1 – rather not, 0 – not opinion, 1 rather yes, 2 – yes, 3 – definitely yes)

system of training medical personnel

-3☐ -2☐ -1☐ 0☐ 1☐ 2☐ 3☐

financing health services

-3☐ -2☐ -1☐ 0☐ 1☐ 2☐ 3☐

limited role of the state in the decision-making process in the system

-3☐ -2☐ -1☐ 0☐ 1☐ 2☐ 3☐

role of health insurance

-3☐ -2☐ -1☐ 0☐ 1☐ 2☐ 3☐

free-market rules

-3☐ -2☐ -1☐ 0☐ 1☐ 2☐ 3☐

priorities in the health care system

-3☐ -2☐ -1☐ 0☐ 1☐ 2☐ 3☐
